# Supplementary material for: Amino Acid Homeostasis and Fatigue in Chronic Hemodialysis Patients
Source: MDPI journal article supplement (doi:10.3390/nu14142810), 2022-07-08
Supplement: s1 [file s1]

**Table S1.** Daily amino acid losses (in grams and as a percentage of daily protein intake) in hemodialysis patients and controls.

| Absolute amino acid losses                                    | Hemodialysis patients | Controls    | Ratio of hemodialysis to controls | P-value |
|---------------------------------------------------------------|-----------------------|-------------|-----------------------------------|---------|
| BCAA                                                          | 0.54 ± 0.21           | 0.02 ± 0.01 | 34                                | <0.001  |
| Total essential                                               | 1.24 ± 0.45           | 0.22 ± 0.13 | 6                                 | <0.001  |
| Total nonessential                                            | 2.77 ± 0.88           | 0.37 ± 0.19 | 7                                 | <0.001  |
| Total all amino acids                                         | 4.01 ± 1.29           | 0.60 ± 0.30 | 7                                 | <0.001  |
| <b>Fractional amino acid losses<br/>(% of protein intake)</b> |                       |             |                                   |         |
| BCAA                                                          | 0.9 ± 0.3             | 0.02 ± 0.01 | 45                                | <0.001  |
| Total essential                                               | 2.0 ± 0.7             | 0.3 ± 0.1   | 7                                 | <0.001  |
| Total nonessential                                            | 4.6 ± 1.8             | 0.4 ± 0.2   | 12                                | <0.001  |
| Total all amino acids                                         | 6.7 ± 2.4             | 0.7 ± 0.3   | 10                                | <0.001  |

Abbreviations: BCAA: branched chain amino acids.

**Table S2.** Linear regression analyses on the determinants of the daily amino acid losses in hemodialysis patients.

| Determinants         | Univariable  |              | Multivariable regression |                  |
|----------------------|--------------|--------------|--------------------------|------------------|
|                      | Std. $\beta$ | P-value      | Std. $\beta$             | P-value          |
| Age                  | -0.27        | <b>0.04</b>  | 0.01                     | 0.9              |
| Sex *                | -0.46        | 0.09         |                          |                  |
| Body mass index      | 0.15         | 0.3          |                          |                  |
| Kt/V                 | 0.46         | <b>0.001</b> | 0.51                     | <b>&lt;0.001</b> |
| Dialysis vintage **  | 0.05         | 0.5          |                          |                  |
| Residual diuresis *  | -0.42        | 0.1          |                          |                  |
| Plasma Hs-CRP **     | -0.04        | 0.6          |                          |                  |
| Plasma albumin       | 0.31         | <b>0.02</b>  | 0.01                     | 0.9              |
| Creatinine excretion | 0.35         | <b>0.006</b> | 0.28                     | 0.2              |
| Protein intake       | 0.32         | <b>0.02</b>  | 0.21                     | 0.3              |

\* Standardized beta does not represent scaled data but the beta for female sex and the presence of residual diuresis. \*\* Data presented for log<sub>2</sub>-transformed data. Abbreviations: CRP: C-reactive protein.

**Table S3.** Single dialysis losses, dialytic clearance and fractional clearances of amino acids in hemodialysis patients.

| Metabolite                 | Single dialysis losses (μmol)          | Dialytic clearance (ml/min) | Fractional clearance (%) |
|----------------------------|----------------------------------------|-----------------------------|--------------------------|
| <b>Essential</b>           |                                        |                             |                          |
| Creatinine                 | 15450 ± 8350                           | 137 ± 68                    | 100%                     |
| Histidine                  | 1940 ± 624                             | 133 ± 32                    | 103 ± 22                 |
| Isoleucine                 | 1890 ± 786                             | 116 ± 40                    | 90 ± 27                  |
| Leucine                    | 3265 ± 1376                            | 121 ± 40                    | 94 ± 27                  |
| Lysine                     | 3717 ± 1384                            | 114 ± 32                    | 89 ± 21                  |
| Methionine                 | 400 ± 221                              | 88 ± 42                     | 67 ± 28                  |
| Phenylalanine              | 1911 ± 797                             | 120 ± 35                    | 93 ± 22                  |
| Threonine                  | 2445 ± 1050                            | 121 ± 35                    | 94 ± 22                  |
| Tryptophan                 | 497 ± 142                              | 80 ± 21                     | 63 ± 17                  |
| Valine                     | 5011 ± 1897                            | 126 ± 35                    | 98 ± 22                  |
| <b>Non-essential</b>       |                                        |                             |                          |
| Alanine                    | 9058 ± 3532                            | 130 ± 40                    | 100 ± 25                 |
| Arginine                   | 1939 ± 871                             | 119 ± 41                    | 93 ± 31                  |
| Asparagine                 | 1723 ± 664                             | 141 ± 44                    | 110 ± 26                 |
| Citrulline                 | 995 [769; 1310]                        | 71 [54; 113]                | 56 [40; 88]              |
| Glutamic acid              | 2262 ± 1302                            | 81 ± 35                     | 62 ± 27                  |
| Glutamine                  | 16288 ± 5423                           | 142 ± 38                    | 111 ± 22                 |
| Glycine                    | 7541 ± 2940                            | 138 ± 27                    | 106 ± 27                 |
| Ornithine                  | 1268 ± 453                             | 94 ± 27                     | 72 ± 18                  |
| Proline                    | 8325 ± 3014                            | 133 ± 36                    | 103 ± 23                 |
| Serine                     | 1842 ± 850                             | 129 ± 51                    | 101 ± 46                 |
| Taurine                    | 307 [56; 549]                          | 20 [8; 51]                  | 17 [6; 37]               |
| Tyrosine                   | 1067 ± 452                             | 101 ± 37                    | 78 ± 25                  |
| <b>Average amino acids</b> |                                        |                             |                          |
| BCAA                       | 10167 ± 3983<br>(= 1.26 ± 0.49 grams)  | 121 ± 38                    | 94 ± 25                  |
| Essential                  | 21076 ± 7548<br>(= 2.88 ± 1.02 grams)  | 113 ± 33                    | 88 ± 21                  |
| Nonessential               | 52829 ± 16642<br>(= 6.40 ± 2.01 grams) | 110 ± 33                    | 85 ± 21                  |
| All amino acids            | 73905 ± 23295<br>(= 9.28 ± 2.93 grams) | 112 ± 32                    | 86 ± 21                  |

Data were presented as mean ± standard deviation for data with a normal distribution and as median [interquartile range] for data not normally distributed. Abbreviations: BCAA: branched chain amino acids.

**Table S4.** Daily dialysis losses and urinary losses of amino acids in hemodialysis patients with residual diuresis.

| Metabolite                 | Daily dialysis losses<br>( $\mu\text{mol}/24\text{ h}$ ) | Daily urinary losses<br>( $\mu\text{mol}/24\text{ h}$ ) | Ratio urinary dialysis losses to<br>urinary losses |
|----------------------------|----------------------------------------------------------|---------------------------------------------------------|----------------------------------------------------|
| <b>Essential</b>           |                                                          |                                                         |                                                    |
| Histidine                  | 763 $\pm$ 255                                            | 81 $\pm$ 62                                             | 10 [6; 26]                                         |
| Isoleucine                 | 744 $\pm$ 346                                            | 4 [2; 11]                                               | 158 [68; 422]                                      |
| Leucine                    | 1278 $\pm$ 589                                           | 9 [3; 27]                                               | 106 [47; 427]                                      |
| Lysine                     | 1463 $\pm$ 584                                           | 75 [38; 151]                                            | 18 [9; 37]                                         |
| Methionine                 | 153 $\pm$ 91                                             | 5 [3; 9]                                                | 29 [14; 39]                                        |
| Phenylalanine              | 775 $\pm$ 395                                            | 14 [5; 35]                                              | 46 [24; 114]                                       |
| Threonine                  | 932 $\pm$ 471                                            | 33 [6; 92]                                              | 23 [9; 140]                                        |
| Tryptophan                 | 200 $\pm$ 70                                             | 7 [2; 21]                                               | 27 [10; 125]                                       |
| Valine                     | 1995 $\pm$ 851                                           | 10 [4; 35]                                              | 145 [67; 381]                                      |
| <b>Non-essential</b>       |                                                          |                                                         |                                                    |
| Alanine                    | 3562 $\pm$ 1453                                          | 131 [69; 217]                                           | 26 [15; 63]                                        |
| Arginine                   | 745 $\pm$ 344                                            | 8 [3; 17]                                               | 68 [39; 224]                                       |
| Asparagine                 | 629 $\pm$ 241                                            | 18 [4; 53]                                              | 27 [13; 190]                                       |
| Citrulline                 | 423 $\pm$ 219                                            | 18 [4; 41]                                              | 24 [9; 83]                                         |
| Glutamic acid              | 912 $\pm$ 588                                            | 17 [8; 27]                                              | 57 [20; 113]                                       |
| Glutamine                  | 6435 $\pm$ 2602                                          | 54 [12; 179]                                            | 107 [34; 535]                                      |
| Glycine                    | 2958 $\pm$ 1344                                          | 558 [279; 857]                                          | 5 [3; 11]                                          |
| Ornithine                  | 521 $\pm$ 179                                            | 8 [3; 27]                                               | 55 [24; 131]                                       |
| Proline                    | 3317 $\pm$ 1271                                          | 114 [22; 206]                                           | 26 [15; 144]                                       |
| Serine                     | 675 $\pm$ 295                                            | 41 [11; 94]                                             | 15 [7; 81]                                         |
| Taurine                    | 123 [16; 246]                                            | 12 [7; 26]                                              | 6 [2; 19]                                          |
| Tyrosine                   | 426 $\pm$ 214                                            | 18 [8; 31]                                              | 17 [10; 44]                                        |
| <b>Average amino acids</b> |                                                          |                                                         |                                                    |
| BCAA                       | 4018 $\pm$ 1761                                          | 24 [9; 74]                                              | 132 [59; 363]                                      |
| Essential                  | 8303 $\pm$ 3398                                          | 232 [104; 531]                                          | 27 [16; 71]                                        |
| Nonessential               | 20751 $\pm$ 7319                                         | 1235 [532; 1882]                                        | 16 [10; 43]                                        |
| All amino acids            | 29054 $\pm$ 10351                                        | 1562 [670; 2376]                                        | 17 [12; 48]                                        |

Data were presented as mean  $\pm$  standard deviation for data with a normal distribution and as median [interquartile range] for data not normally distributed. Abbreviations: BCAA: branched chain amino acids.

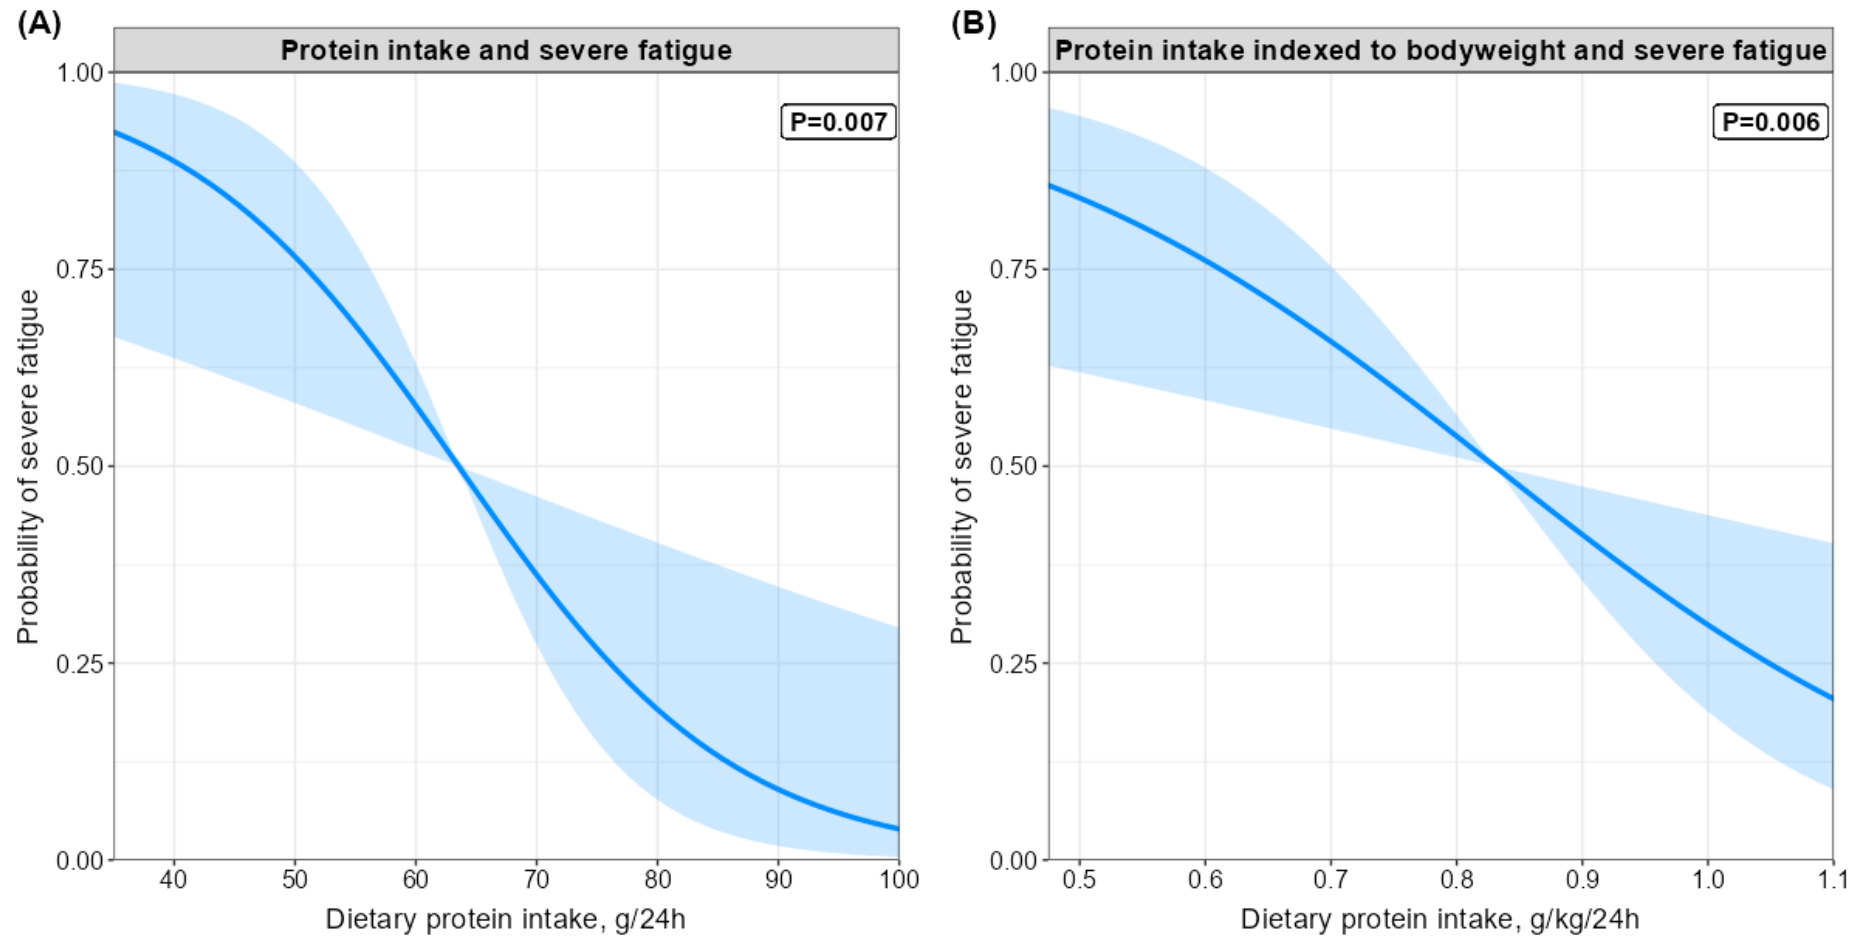

**Figure S1.** Graphical representation of the association of protein intake (A) and protein intake indexed to body weight (B) with the probability of severe fatigue. The analyses are adjusted for age, sex, body mass index, dialysis vintage, hemoglobin concentration, C-reactive protein concentration, presence of cardiovascular disease, and presence of diabetes.

**Table S5.** Sensitivity analyses of the logistic regression analyses with severe fatigue.

|                                  | Excluding outliers in the<br>concerned variable * |         | Excluding patients with 2<br>dialysis sessions per week |         | Excluding patients with >60<br>months dialysis vintage |         | Excluding participants with<br>BMI < 18.5 |         | Excluding participants with<br>low hemoglobin ** |         |
|----------------------------------|---------------------------------------------------|---------|---------------------------------------------------------|---------|--------------------------------------------------------|---------|-------------------------------------------|---------|--------------------------------------------------|---------|
|                                  | OR [95% CI]                                       | P-value | OR [95% CI]                                             | P-value | OR [95% CI]                                            | P-value | OR [95% CI]                               | P-value | OR [95% CI]                                      | P-value |
| Plasma taurine concentration     | 0.35 [0.10 ; 0.85]                                | 0.045   | 0.27 [0.08 ; 0.66]                                      | 0.011   | 0.29 [0.08 ; 0.75]                                     | 0.027   | 0.30 [0.10 ; 0.71]                        | 0.015   | 0.30 [0.09; 0.74]                                | 0.023   |
| Plasma proline concentration     | 2.03 [0.96 ; 4.91]                                | 0.082   | 2.69 [1.15 ; 8.45]                                      | 0.053   | 2.15 [0.98 ; 6.44]                                     | 0.10    | 2.94 [1.25 ; 9.31]                        | 0.035   | 3.03 [1.26; 10.1]                                | 0.038   |
| Daily taurine losses             | 0.68 [0.43 ; 1.02]                                | 0.069   | 0.66 [0.43 ; 0.95]                                      | 0.033   | 0.42 [0.21 ; 0.72]                                     | 0.005   | 0.65 [0.42 ; 0.93]                        | 0.029   | 0.68 [0.44; 0.99]                                | 0.050   |
| Protein intake                   | 0.28 [0.09 ; 0.68]                                | 0.010   | 0.18 [0.04 ; 0.56]                                      | <0.001  | 0.08 [0.01 ; 0.35]                                     | 0.005   | 0.18 [0.04 ; 0.55]                        | 0.008   | 0.19 [0.04; 0.60]                                | 0.013   |
| Protein intake per kg bodyweight | 0.25 [0.08 ; 0.60]                                | 0.006   | 0.23 [0.06 ; 0.59]                                      | 0.008   | 0.09 [0.01 ; 0.33]                                     | 0.003   | 0.21 [0.06 ; 0.57]                        | 0.006   | 0.23 [0.07; 0.63]                                | 0.012   |

\* Defined as all values deviating more than two standard deviations from the mean. Analyses are adjusted for age, sex, body mass index, dialysis vintage, hemoglobin concentration, C-reactive protein concentration, presence of cardiovascular disease, and presence of diabetes. Abbreviations: BMI: Body mass index.

\*\* Defined as the lowest 5<sup>th</sup> percentiles in males and females.
